# Supplementary material for: FGF21 protects against hepatic lipotoxicity and macrophage activation to attenuate fibrogenesis in nonalcoholic steatohepatitis
Source: eLife. 2023 Jan 17;12:e83075. doi: 10.7554/eLife.83075 (PMC9928421; doi:10.7554/eLife.83075)
Supplement: Figure 1—source data 1. [file elife-83075-fig1-data1.xlsx]

## Sheet: Figure 1B
	Figure 1B
	Codon-optimized FGF21 mRNA expression (relative to LFCD group)							Endogenous FGF21 mRNA expression (relative to LFCD group)
	Liver			gWAT				Liver
	LFCD	HFCD	HFCD+FGF21	LFCD	HFCD	HFCD+FGF21		LFCD	HFCD	HFCD+FGF21
	1.5	0.96	227.32	1.45	0.96	1.15		1.13	0.41	2.01
	1.44	1.99	484.59	0.76	0.67	1.19		1.37	2.35	2.71
	0.73	0.62	110.75	2.03	0.92	0.26		0.7	0.6	0.52
	0.28	1.71	108.21	0.68	0.87	0.4		0.45	2.15	0.41
	1.01	0.87	417.06	1.62	0.85	0.25		0.84	1.08	0.69
	1.17	0.54	244.37	0.25	1.44	0.28		1.05	0.56	0.7
	1.19	1.17	319.81	0.33	6.93	1.03		0.71	0.87	1.12
	1.53	2.18	76.63	0.29	1.51	2.23		1.74	3.39	0.4
	0.8	12.23	611.24	0.37	1.92	1.14		1.42	14.98	0.62
	1.37	21.44	346.24	1.76	1.69	1.37		1.82	3.31	2.03
	1.07	3.11	283.25	2.46	1.35	0.25		0.77	1.21	0.73
	1.37	1.16	223.18	1.92	3.12	0.71		1.33	0.77	1.41
	0.31	1.07	250.4	0.68	2.03	2.04		1.71	3.73	0.73
	0.7	4.75	240.98	0.28	8.2	1.3		0.31	8.11	2.37
	0.63	9.16	59.59	0.54	1.12	1		0.59	0.55	1.49
	0.9	1.3	245.63	0.51	0.92	0.55		0.61	1.37	0.36
			299.52	1.06	0.48	0.96		0.84		0.55
			246.67		0.75			0.6

## Sheet: Figure 1C
	Figure 1C
	Plasma FGF21 levels (pg/mL)				Plasma FGF21 levels ((pg/mL)				Plasma FGF21 levels (pg/mL)
	Week -1				Week 4				Week 23
	LFCD	HFCD	HFCD+FGF21		LFCD	HFCD	HFCD+FGF21		LFCD	HFCD	HFCD+FGF21
	332	196	221		403	592	121926		379	4850	42477
	252	335	161		444	549	130327		646	1972	180058
	370	532	637		257	536	96262		265	2137	129942
	215	350	306		461	559	133120		143	455	53771
	302	165	330		371	835	68717		248	1212	123975
	294	231	258		407	480	98401		379	505	42255
									176	1031	84104
									352	977	85349
									246	174	80962
									669	723	30956
									368	556	80824
									246	629	99016
									288	5083
									211
									309
									248

## Sheet: Figure 1D
	Figure 1C
	Body weight (g)
	Time (weeks)	LFCD																		HFCD																	HFCD+FGF21
	-1	31.8	29.5	28.1	28.2	27.3	28.8	29	29.2	28.1	30.2	31	30.1	28.9	28.8	29	30.4	28	28	28	25.8	27.7	30.6	29.6	29.4	30.7	27.8	27.5	26.9	27.9	28.1	31	30.3	30.8	29.9	27.7	26.9	26.1	29	28.1	23.8	28.2	31.9	31.7	26.9	26.4	28.4	26.3	30.7
	0	30.22	29.77	27.53	27.26	27.65	29.17	29.57	28.76	28.81	30.73	30.65	30.07	28.74	29.11	29.52	30.7	28.63	27.87	28.02	26.15	27.78	30.56	29.34	28.96	30.85	27.11	27.86	27.3	27.78	27.85	31.02	29.85	30.74	29.9	27.42	26.68	24.75	27.58	26.69	23.3	26.7	30.85	30.83	27.3	26.75	28.21	25.78	30.03
	1	30.6	30.04	29	28.78	29.06	29.9	29.87	29.41	29.63	30.84	30.83	29.94	29.03	30.29	29.95	30.9	29.48	27.61	28.89	27.11	30.54	31.62	30.14	31.14	34.16	30.13	28.83	27.65	28.63	29.4	32.29	29.94	32	31.19	28.84	27.73	22.08	25.31	25.04	22.37	24.68	27.74	27.62	25.52	23.54	26.02	24.09	26.5
	2	30.18	30.07	27.89	27.73	27.55	30	29.43	29.78	29.86	30.72	30.92	29.9	29.42	29.9	30.14	30.7	29.02	27.6	28.69	27.05	30.2	31.07	29.77	30.94	34.04	29.5	29.88	27.78	29.35	29.89	33.07	31.58	31.8	31.08	29.06	28.15	19.69	23.51	24.4	21.58	23.52	24.79	26.12	24.42	22.22	24.07	23.22	25.15
	3	31.56	30.05	27.23	27.9	27.67	29.24	29.05	30.03	29.31	30.68	30.59	30.22	30.23	29.7	30.34	30.94	29.05	28.22	29.27	28.5	32.48	31.42	30.21	31.76	36.27	31.32	31.03	27.83	30.62	31.67	33.68	32.87	32.7	31.51	29.04	28.35	20.28	24.31	24.3	21.3	22.85	24.92	25.56	23.74	21.98	25.51	23.39	24.82
	4	31.87	30.02	28.28	28.36	28.69	30.3	29.86	30.39	30.42	31.29	31.03	30.5	30.16	30.21	30.17	31.41	29.47	29.11	29.81	28.88	34.66	32.34	30.54	33.14	38.29	32.22	32	28.87	31.9	33.38	34.02	32.93	33.46	32.71	30.99	29.75	19.72	24.33	26.13	21.62	23.52	24.6	26.61	23.77	22.04	25.19	24.13	25
	5	31	30.8	28.6	29	28.4	30.2	29.9	30.5	31.3	31.4	31.1	30.3	30.2	29.7	31.6	32.5	30.3	29.8	30	29.1	36	32.2	30.6	33.4	37.7	32.8	32.9	28.4	32	32.6	33	32.9	34.1	33.6	31.2	30.4	20.1	24.8	25.3	22.1	24	24.3	27.2	24.3	22.7	25.3	24.4	25.8
	6	31.1	30.3	28.2	29	28.8	29.7	29.8	30.3	30.6	31.7	31.1	30.1	29.7	29.2	30.6	31.5	30.6	30.2	29.1	29.1	35.2	32.1	32.1	32.6	37.7	32.7	32.6	28.4	31	32.1	32.7	33	35	34	30.9	29.5	19.2	24.4	24.2	21.4	23.2	25.2	26.9	24.1	22.3	24.4	23.6	24.9
	7	31.2	30.3	28.4	29.4	29.3	30.3	29.4	30.4	31.4	32.1	31.4	30.8	30.3	29.3	30.8	31.8	30.9	30.7	28.5	28.9	36.5	33.5	32.2	33.7	38.6	34.7	33.8	29.4	31.2	33	32.8	34.7	35.4	34.9	31.6	29.8	19.9	24.6	23.9	21	23.6	25.2	26.9	23.8	21.8	24.3	24	24.5
	8	32.2	32	29	30.5	29.4	31.3	30.7	31.2	32.2	33.1	32.6	31.4	31.3	30	32.2	30.8	31.3	31.3	30.1	29.9	38.5	35.5	31.9	34.7	41.3	35.4	34.2	28.9	33.9	35.4	34.5	35.7	36.4	35	32.6	31.8	18.9	23.3	24.9	21.1	23.7	25	25.6	23.7	22.2	25.1	24.2	23.9
	9	32.3	31.3	29.4	30.4	29.6	31.4	30.9	31.4	32.3	33.9	33	32.2	31.5	30.6	31.8	32.5	32	30.9	29.8	29.3	38.7	34.5	31.2	34.9	42.1	36.4	33.8	28.4	34.2	37.2	34.6	36.7	35.5	34.8	30.9	30.4	19.1	23.3	24.6	20.9	23.4	24.9	26.2	23.8	22.6	24.1	24.1	24.9
	10	31.9	31.7	28.9	29.7	29.8	31.1	30.3	31.2	31.3	33.5	32.1	31.7	31	30.8	32.2	32.4	31.1	30.9	29.4	29	38.2	33.1	31.6	34.2	39.4	36.1	34.9	29.5	33.5	36.1	35.6	36.8	37.4	36.9	31.3	31.9	19.2	23.6	24.3	21	22.9	24.5	25.5	24.2	22.2	24.2	23.7	24.3
	11	32.3	31.9	29.6	30.1	30.4	31.7	30.9	31.5	31.7	33.6	32.3	31.9	31.6	31	32	33	31.5	31.5	31.4	30.4	40.8	33.6	32	36.5	40.6	38.6	36	30.4	37.1	38.9	37.8	38.9	38.7	38.7	33.3	33.6	19.8	24.4	25.6	21.4	23.7	25.1	26.7	24.2	23.4	26.1	24.6	25
	12	31.6	30.73	29.73	29.83	30.21	31.61	30.34	30.64	30.78	33.18	32.3	31.39	31.5	30.5	31.71	32.38	29.04	30.56	30.93	30	41.12	33.49	32.52	36.12	40.49	38.48	35.2	30.5	37.37	38.15	38.97	39.99	37.93	37.36	33.61	33.26	23.74	25.56	24.81	21.66	23.09	24.56	25.92	24.37	23.45	25.76	23.9	23.16
	13	31.61	31.15	30.56	30.73	30.8	32.89	31.17	31.67	32.13	34.51	33.08	31.84	30.92	30.5	31.79	31.17	31.07	32.21	30.58	28.68	38.79	34.51	32.66	36.66	41.5	40.94	35.93	31.4	38.97	40.05	40.06	40.4	39.62	38.93	34.76	35	20.71	24.89	25.2	21.91	23.5	25.46	26.7	24.13	23.5	25.42	24.93	26.2
	14	30.78	30.86	30.38	30.18	30.27	31.87	30.88	30.87	30.9	33.47	32.72	31.71	30.95	30.26	30.94	31.74	30.86	31.28	31.39	30.21	40.32	34.54	33.16	37.01	42.27	40.44	35.93	31.87	38.74	40.13	38.14	39.39	38.87	38.36	34.93	34.33	19.96	24.28	25.61	22.12	24.04	25.16	26	24.68	23.93	25.2	24.52	25.92
	15	31.72	31.32	31.49	30.7	30.64	32.53	30.86	31.26	31.44	34.43	33.4	32.61	32.11	31.63	32.38	32.77	30.68	32.3	31.39	30.15	43.25	34.29	32.68	37.08	38.03	42.2	37.63	33.03	39.42	40.23	39.08	40.36	40.92	40.03	36.01	33.75	20.96	24.43	24.85	22.1	23.25	26.38	26.34	23.68	23.35	25.74	24.53	27.44
	16	31.86	31.24	31.64	31.15	31.05	32.92	31.01	31.63	31.25	34.43	33.32	32.56	31.93	31.61	32.48	32.65	30.73	32.06	31.56	30.84	44.76	33.89	32.37	37.33	39.26	42.7	38.86	33.19	40.65	40.87	39.72	40.03	39.21	38.6	35.2	32.78	20.59	24.63	25.3	21.86	22.82	25.89	26.12	24.46	24.22	25.06	23.9	27.77
	17	31.48	30.82	32.09	31.64	31.56	33.87	31.26	31.97	31.4	34.58	33.36	32.48	32.18	32	32.88	32.91	31.3	31.96	31.81	30.59	46.28	34.66	31.94	37.23	39.66	43.99	38.73	33.27	40.65	41.36	41.45	40.5	40.72	41.72	36.2	34.94	21.44	24.9	25.6	21.68	23.34	26.25	26.08	24.62	24.15	26.15	24.22	26.68
	18	31.41	31.42	32.04	31.53	30.75	33.25	31.13	31.55	31.23	33.85	33.6	33.11	32.53	31.71	33.12	33.41	31.13	31.95	31.37	30.6	47.29	35.26	32.46	37.77	39.19	45.27	39.16	33.56	43.38	42.17	42.47	40.48	41.57	41.55	36.38	34.6	21.08	25.09	25.88	21.76	22.77	26.43	26.87	25.04	25.09	26.98	24.4	27.38
	19	31.2	30.8	31.5	31.7	30.5	33.1	30.3	31.3	31.5	33.8	33.6	32.6	32.8	31.9	32.1	33.2	31.8	32	30.4	29.5	46	34.2	31.9	36.7	39.3	44.4	38.1	32.8	43.5	42.4	42	42.3	40	38.6	34	32.6	21	24	25.8	21.8	23.5	26.2	26.1	24.8	23.9	25	24.4	27.8
	20	31.6	31.5	31.04		30.15	33.08	30.5	31.22	31.37	34.71	34.12	32.65	33.48	32.38	32.88	31.9	31.88	32.3	30.81	29.31	46.6	34.99	33.4	39.91	40.06	46.01	39.46	34.58	45.49	45.83	40.9	42.5	44.12	41.44	36.94	34.78	21.15	24.11	26.73	22.72	24.58	26.6	25.55	24.89	24.24	25.84	24.62	28.98
	21	32	32.35	32.64	30.72	30.73	33.59	30.91	31.83	31.99	34.38	34.22	32.17	32.72	32.52	32.13	32.7	34.23	32.73	32.36	30.32	48.14	36.02	33.15	38.19	41.47	41.09	38.01	35.24	45.1	43.18	44.41	42.27	44.96	41.6	36.37	34.2	22.73	25.94	25.49	22.96	23.6	27.84	27.03	24.17	24.44	27.87	24.41	28.25
	22	31.36	31.86	31.36	30.69	30.7	33.22	30.89	30.56	30.29	33.48	33.38	31.68	31.05	31	32.18	32.67	32.88	31.49	32.62	30.31	49.29	34.44	33.09	36.69	43.87	42.95	38.38	35.3	47.78	44.15	43.18	41.7	47.49	43.05	38.64	35.11	22.81	26.91	26.02	23.26	22.96	26.83	27.07	23.01	23.62	26.65	24.26	27.79
	23	31.42	31.54	31.81	31.27	30.96	33.31	30.5	31.12	31.72	34.09	33.13	31.5	31.93	31.95	31.11	33.05	33.62	32.77	32.73	31.4	49.62	34.91	33.09	37.53	46.14	43.5	38.62	35.91	46.68	44.26	43.05	42.83	48.37	43.98	38.53	34.59	22.99	26.59	26.28	22.98	23.69	28.44	27.93	23.35	24.32	27.09	24.23	28.74
[truncated: 6 more columns]

## Sheet: Figure 1E
	Figure 1D
	Weights of brown adipose tissue (BAT) and white adipose tissue (WAT) depots
	WAT weight (g)	LFCD																		HFCD																		HFCD+FGF21
	gWAT (g)	0.35	0.391	0.76	0.653	0.71	0.354	0.74	0.495	0.397	0.933	0.721	0.597	0.835	0.648	0.588	0.527	0.424	0.414	0.693	0.58	3.3	1.142	1.053	1.561	2.889	3.148	1.942	1.982	3.473	3.016	2.256	2.449	3.173	1.517	2.306	2.9007	0.281	0.836	0.997	0.706	0.587	0.88	0.819	0.467	0.663	0.672	0.463	0.757
	sWAT (g)	0.206	0.197	0.427	0.453	0.457	0.22	0.41	0.265	0.196	0.454	0.331	0.302	0.373	0.31	0.306	0.253	0.288	0.278	0.342	0.322	2.051	0.456	0.397	0.55	1.548	1.647	0.985	0.762	1.807	2.014	1.273	1.225	1.389	0.566	1.13	1.083	0.281	0.562	0.604	0.485	0.424	0.528	0.422	0.391	0.51	0.567	0.284	0.501
	BAT weight (g)	LFCD																		HFCD																		HFCD+FGF21
	iBAT (mg)	58	61	83	97	84	54	100	105	85	120	77	71	114	102	125	96	100	87	93	77	241	110	86	111	186	180	163	175	198	178	264	179	140	96	120	96	75	75	86	70	78	94	82	67	73	105	72	108
	sBAT (mg)	42	58	52	68	54	37	69	59	78	86	53	55	84	80	75	83	88	77	44	65	125	70	59	97	140	115	113	83	163	110	150	133	116	78	71	72	42	53	47	45	38	81	52	51	41	71	56	78
[truncated: 6 more columns]
