# Supplementary material for: FGF21 protects against hepatic lipotoxicity and macrophage activation to attenuate fibrogenesis in nonalcoholic steatohepatitis
Source: eLife. 2023 Jan 17;12:e83075. doi: 10.7554/eLife.83075 (PMC9928421; doi:10.7554/eLife.83075)
Supplement: Figure 2—figure supplement 1—source data 1. [file elife-83075-fig2-figsupp1-data1.xlsx]

## Sheet: Figure 2-supplement 1
	Figure 2-figure supplement 1
	gWAT gene expression (relative to LFCD group)
	Genes	LFCD																	HFCD																		HFCD+FGF21
	Klb		1.05	1.01	0.59	1.45	1.16	1.06	1.09	0.93	0.87	1.25	0.68	0.94	0.63	1.01	0.85	1.4	1.91	1.9	0.59	0.78	0.66	0.62	1.41	1.14	0.61	1.3	0.56	0.54	0.67	1.71	0.67	1.43	0.68	0.41	0.65	0.81	1.94	1.36	1.78	0.93	2.19	1.12	0.72	1.65	1.14	2.32	1.38
	Fgfr1	0.86	0.61	0.56	0.94	0.78	1.38	1.38	1.11	1.14	0.99	0.67	0.77	1.01	1.04	1.41	0.89	1.46	1.06	1.26	1.37	0.58	0.92	0.96	0.85	0.7	0.76	0.94	0.79	1.09	0.94	0.46	1.01	1.37	0.98	0.79	1.11	0.62	1.28	1.25	1.3	1.06	1.21	0.82	1.01	2.83	0.98	1.72	0.8
[truncated: 4 more columns]
