# Supplementary material for: FGF21 protects against hepatic lipotoxicity and macrophage activation to attenuate fibrogenesis in nonalcoholic steatohepatitis
Source: eLife. 2023 Jan 17;12:e83075. doi: 10.7554/eLife.83075 (PMC9928421; doi:10.7554/eLife.83075)
Supplement: Figure 2—source data 1. [file elife-83075-fig2-data1.xlsx]

## Sheet: Figure 2A
	Figure 2A
	Lipid droplet content in iBAT (relative to LFCD)				UCP-1 content in iBAT (relative to LFCD)
	LFCD	HFCD	HFCD+FGF21		LFCD	HFCD	HFCD+FGF21
	0.386912	0.306765	0.416763		1.24431	1.10953	1.31986
	0.656006	0.597234	0.151195		1.14002	1.18649	1.17828
	1.43817	2.54333	0.395509		0.953929	0.681258	1.10167
	1.43045	1.75717	0.259725		0.99225	0.985761	1.20582
	1.11428	0.679848	1.63821		0.975971	1.04422	1.19339
	1.56112	1.86467	0.323177		0.744354	0.914122	1.16174
	0.626128	2.27822	0.326662		1.02074	0.83134	1.17791
	0.642966	2.36821	0.950165		1.05083	0.776656	1.28693
	0.603718	1.64492	0.183439		1.09649	0.836365	1.28004
	2.1743	1.89639	0.502114		0.920649	0.829317	0.958619
	0.897533	2.12084	0.346819		0.988757	0.861621	1.1317
	0.715935	2.5602	0.789474		1.14683	0.805244	0.992509
	1.36654	2.03942	0.414386		0.945893	0.721502	1.04712
	1.19663	1.99251	0.485765		0.981603	0.746245	1.15108
	1.18255	2.5625	0.763272		0.845642	0.823475	1.2088
	1.03985	1.59196	1.77123		0.949221	1.01943	1.06414
	0.517039	1.26812	0.360108		1.00251	1.07891	1.14132
	0.449873	1.61804	0.596518			1.0751	1.0418

## Sheet: Figure 2B
	Figure 2B
	Adipocyte size in sWAT (× 103 µm2)				UCP-1 expression in sWAT
	LFCD	HFCD	HFCD+FGF21		LFCD	HFCD	HFCD+FGF21
	1.15	1.37	1.64		2.88366	1.31338	0.930144
	1.13	1.05	2.18		0.700938	0.885985	1.76566
	1.87	4.38	2.89		0.781545	0.417058	1.57851
	2.06	1.64	2.28		0.593694	0.77033	1.85258
	2.84	2.02	2.55		0.30631	0.867761	1.07243
	1.92	3.06	2.09		1.05842	0.573367	3.01543
	0.95	4.32	3.04		0.839373	0.360983	0.649769
	0.91	7.19	1.84		2.91152	0.506077	1.89814
	1.08	6.64	2.99		0.332945	0.358179	0.313319
	2.34	5.94	2.82		0.739489	0.218693	1.82664
	1.59	5.09	1.15		0.604559	0.617526	1.1236
	1.7	7.81	2.41		0.556544	0.832363	0.820097
	1.35	4.04	1.67		0.750003	1.45374	0.719162
	1.19	2.34	2.5		0.941009	0.511684	0.738788
	1.29	4.67	2			0.57547	0.579675
	1.15	4.57	3.32				2.33062
		2.77	4.5
		4.27	1.65

## Sheet: Figure 2C
	Figure 2C
	Adipocyte size in gWAT (× 103 µm2)				Crown-like structure in gWAT (number/mm2)
	LFCD	HFCD	HFCD+FGF21		LFCD	HFCD	HFCD+FGF21
	0.97	3.48	2.18		0	0	0
	2.48	3.23	3.25		0	0	0
	2.42	7.95	3.49		0	0.42	0.25
	2.41	3.59	2.54		0.05	0	0
	2.12	3.49	2.46		0.3	2.83	0
	3.12	10.65	2.18		0	3.58	0
	1.6	6.74	2.64		0	0	0.22
	1.45	8.4	3.72		0	0.8	0
	2.22	5.65	3.55		0	4.41	0.37
	3.63	6.05	3.7		0.79	2.93	0.19
	2.41	6.11	1.82		0	0.66	0
	2.9	7.02	2.96		2.01	0.76	0
	1.74	7.07	3.77		0	5.39	0
	2.67	6.87	2.81		0	0.91	0.34
	1.78	5.66	4.53		0	0.35	0.13
	1.43	8.37	2.5		0	0.28	0.29
	1.58	6.96	3.65		0		0
					0

## Sheet: Figure 2D
	Figure 2D
	Pro-inflammatory gene expression in gWAT (relative to LFCD)
		LFCD																	HFCD																		HFCD+FGF21
	Adgre1	0.86	0.92	0.7	1.13	0.69	0.81	1.09	1.57	0.97	1.44	0.82	0.71	0.8	0.89	1.03	1	1.57	2.15	0.83	2.45	1.21	2.86	1.34	2.46	1.42	0.97	1.71	1.94	4.13	1.32	0.69	6.67	1.2	1.98	1.53	0.57	0.42	2.7	1.18	1.64	0.44	1.38	0.58	0.5	0.74	0.82	1	0.36
	Tnfα	1.32	1.77		1.51	3.12	0	0.75	0.42	0.62	1.13		2.98	0.37	0.6	0.14	0.01	0.25	1.57	0.36	1.11	1.22	0.98	6.43	2.04	3.64	5.63	2.13	0.98	2.36	5.98		2.52	0.31	0.79	1.07	0.28	2.18	0.57	0.64	0.22	0.13	1.16	2.54	1.27	1.23	0.2	0.59
	Il1b	0.73	1.7	0.17	0.68	0.38	0.57	1.02	0.46	0.65	0.34	0.82	1.48	2.03	2.22			1.76	0.6		0.67	0.62	1.06	3.1		0.71	2.67	1.22	0.81	2.14	4.12	2.94	2.11	1.35	1.67	1.02	0.34	0.53	1.01	1.33	0.87	0.48	0.55	0.27	0.75	2.61	0.51	1.06	0.64
	Ccl2	1.3	1.42	2.52	0.74		0.31	0.41	0.17	0.91	1.48	2.42		0.47	0.57	0.9	0.83	0.54	0.77		1.34	0.78	0.74	3.1	1.41	1.68	1.76	0.9	2.39	2.83	4.84		1.18		0.66	1.09	0.32	1.73	0.4	0.42	0.24	0.18	1.06	1.49	0.74	1.01	0.25	0.31
[truncated: 4 more columns]

## Sheet: Figure 2E
	Figure 2E
	Plasma adiponectin levels (µg/mL)
	LFCD	HFCD	HFCD+FGF21
	7.84	5.14	15.44
	8.1	6.03	13.06
	7.01	5.13	18.52
	6.73	5.36	10.84
	8.23	5.81	13.12
	7.35	5.09	13.63
	7.06	7.72	17.78
	6.92	7.19	11.35
	7.42	6.6	17.64
	7.44	7.26	11.54
