# Supplementary material for: FGF21 protects against hepatic lipotoxicity and macrophage activation to attenuate fibrogenesis in nonalcoholic steatohepatitis
Source: eLife. 2023 Jan 17;12:e83075. doi: 10.7554/eLife.83075 (PMC9928421; doi:10.7554/eLife.83075)
Supplement: Figure 3—figure supplement 1—source data 1. [file elife-83075-fig3-figsupp1-data1.xlsx]

## Sheet: Figure 3-figure supplement 1A
	Figure 3-figure supplement 1A
	Fasting plasma TC (mM)
	Time (weeks)	LFCD																		HFCD																		HFCD+FGF21
	-1	3.183	3.693	4.08	4.647	3.405	5.211	3.234	4.62	2.922	4.047	3.852	3.21	3.885	4.068	3.594	2.967	3.534	2.805	3.54	3.129	3.909	3.486	3.363	4.737	3.672	4.959	3.711	3.774	3.603	3.102	3.12	4.311	3.729	3.393	3.072	2.412	5.301	3.474	3.435	4.911	4.113	3.408	3.129	3.435	3.387	3.438	4.335	2.958
	4	1.866	2.64	2.784	2.652	3.213	3.159	2.562	4.218	2.295	2.703	2.844	2.238	2.337	2.703	2.547	2.346	2.721	2.07	8.436	10.29	10.014	8.049	7.71	8.124	13.176	8.283	8.529	6.687	9.834	11.481	7.23	10.755	8.433	9.045	7.785	11.853		8.7	11.634	10.092	12	11.667	8.085	9.51	9.237	13.371	11.985	4.974
	8	2.305	2.455	3.025	2.965	4.155	2.95	3.055	2.83	2.37	3.025	3.055	3.26	1.845	2.38	2.25	2.36	3.38	2.22	7.55	7.4	8.24	7.06	6.815	8.07		9.19		7.335	9.435	10.425	6.695	7.77	7.55	6.555	6.38	9.615		7.23	9.555	11.5	10.915	7.715	10.355	8.365	9.24	6.91	11.53	5.265
	12	1.205	2.975	3.095	3.255			2.365	2.86	2.35	2.66	2.92	2.675	2.43	2.54	2.38	2.39	2.605	5.29	18.565	11.18	17.225	5.585		7.21		10.295	6.175	7.175	7.89	9.06	7.165	12.155			7.285	12.6		6.535	15.365	8.54	5.295	7.55	10.13	9.885	10.495		8.47	4.11
	16	2.035	2.93	3.3	3.48	3.27	3.125	2.85		2.55	7.78	3.355	3.32	3.645	3.01	2.55	2.765	3.23	2.305	7.51	5.52	12.225	6.185	5.225	5.14	10.67	15.76	6.71		9.475	10.44	10.685	14.94	10.005	7.285	7.735	12.195		10.07	11.715	15.12	11.765	7.825	10.335		11.395	10.635	10.37	11.05
	20	1.675	2.42	2.73	3.005	2.525	2.34	1.875	2.495	2.15	2.32	2.465	2.435	2.7	2.235	2.32	2.27	2.655	2.245	6.335	3.19	9.74	6.105	5.9	6.245	11.91	15.47	5.915	8.625	10.495	10.52	9.265	10.53	9.065	6.345	6.725	11.06		11.72	10.335	9.78	8.43	8.27	10.205	10.59	10.52	8.18	14.525
	22	1.6	2.475	2.655		2.67	2.17	2.095	3.07	2.135	2.1	2.245	2.79	2.155	2.16	2.135	1.98	2.28	1.925	6.905	5.875	10.495				8.9	14.915	5.49	7.015	12.045	8.745	8.97	10.95	8.755	7.23	6.415	8.835		8.71	11.145	12.425	9.915	6.65	10.34	8.955	11.075	9.275	7.755	7.08
[truncated: 6 more columns]

## Sheet: Figure 3-figure supplement 1B
	Figure 3-figure supplement 1B
	Plasma lipoprotein TC (mM)
	Fraction	LFCD	HFCD	HFCD+FGF21
	0
	1	0.02	0	0.01
	2	0	0	0
	3	0.02	0.09	0.06
	4	0.12	0.57	0.69
	5	0.24	0.91	1.05
	6	0.19	0.74	0.86
	7	0.17	0.64	0.74
	8	0.16	0.57	0.66
	9	0.14	0.52	0.58
	10	0.13	0.44	0.5
	11	0.09	0.32	0.42
	12	0.07	0.25	0.34
	13	0.06	0.19	0.25
	14	0.05	0.14	0.21
	15	0.02	0.14	0.21
	16	0.08	0.29	0.31
	17	0.21	0.55	0.58
	18	0.21	0.63	0.61
	19	0.15	0.5	0.44
	20	0.08	0.29	0.24
	21	0.05	0.12	0.12
	22	0.02	0.06	0.07
	23	0.02	0.05	0.03
	24	0.02	0.02	0.02
	25	0	0	0
