# Supplementary material for: FGF21 protects against hepatic lipotoxicity and macrophage activation to attenuate fibrogenesis in nonalcoholic steatohepatitis
Source: eLife. 2023 Jan 17;12:e83075. doi: 10.7554/eLife.83075 (PMC9928421; doi:10.7554/eLife.83075)
Supplement: Figure 3—source data 1. [file elife-83075-fig3-data1.xlsx]

## Sheet: Figure 3A
	Figure 3A
	Fasting plasma glucose levels (mM)
	Time (weeks)	LFCD																		HFCD																		HFCD+FGF21
	-1	11.868	15.384	13.893	14.781	11.814	6.771	8.991	9.807	10.146	13.458	11.229	11.856	8.532	8.76	5.187	5.559	10.347	11.394	11.82	8.442	10.08	13.497	9.447		10.137	13.53	11.835	12.207	11.232	8.667	10.122	11.067	9.858	9.885	9.453	10.596	13.29	12.642	9.654	10.761	9.405	11.394	8.646	11.637	12.375	13.176	15.156	7.638
	4	10.95	10.725	11.793	13.491	11.559	11.451	8.79	10.911	8.469	12.645	13.116	14.172	12.528	12.414	8.088	8.286	11.802	9.12	13.725	14.592	14.553	11.025	12.387	12.387	17.343	14.499	9.366	10.881	11.562	12.432	11.337	11.25	13.422	12.534	12.87	9.396	7.362	9.969	9.774	8.787	7.98	9.801	8.106	8.211	7.293		9.45	9.213
	8	8.925	7.465	10.215	9.42	10.015	8.585	9.125	9.575	9.585	12.71	10.685	9.93	4.64	7.39	6.265	5.91	11.79	8	10.365	11.09	7.54	10.78	10.88	11.16	13.1	10.205		11.415	10.76	12.11	12.66	10.31	9.055	10.285	8.44	11.755		10.555	10.21	7.36	6.615	9.04	8.62	8.36	8.605	8.515	11.34	7.845
	12		9.295	11.22	10.69		9.675	7.765	11.4	10.34	10.89	9.315	9.29	10.355	9.845	9.645	9.135	8.825	10.06	14.94	10.305	12.24	10.235		12.645			9.16	9.98	11.5	11.515	12.865	10.775		9.83	9.995	10.83		10.14	9.88	9.095	7.905	9	10.04	5.895	9.05	4.035	11.085	9.26
	16	7.775	7.05	8.28	7.975	8.975	9.6	9.065		8	8.665	8.02	8.88	10.17	9.975	8.38	6.655	7.53	7.5	9.925	6.38	11.485	9.1	9.44	7.46	9.61	12.475	10.855		9.505	11.73	12.545	13.395	11.07	10.275	8.665	10.055		7.21	7.86	6.925	5.48	8.48	9.2		8.385	8.125	6.99	10.725
	20	9.335	10.305	8.12	11.445	8.575	8.49	7.87	10.59	11.535	9.08	9.16	9.575	9.145	11.065	7.1	8.75	8.415	7.82	9.67	8.335	11.325	9.955	9.875	8.85	10.005	11.115	9.415	9.92	10.64	11.055	12.075	9.685	11.385	9.675	10.625	10.58		8	8.01	5.765	8.34	8.565	8.015	8.095	9.365	8.345	11.9	7.875
	22	8.2	7.35	10.16		10.42	10.215	7.61	8.545	8.04	10.095	10.27	9.745	10.14	9.13	9.835	7.565	9.24	10.195	9.955	9.225	12.51	8.19	7.475	8.455	13.555	13.095	9.2	8.87	10.255	10.975	14.01	12.285	10.585	9.825	8.005	9.185		10.435	7.425	7.99	7.03	8.54	9.695	8.735	8.69	9.85	8.295	7.065
[truncated: 6 more columns]

## Sheet: Figure 3B
	Figure 3B
	Blood glucose (mM)
	Time (min)	LFCD								HFCD								HFCD+FGF21
	0	11.1	9.5	11.1	9.2	8.7	8.8		8.8	12.4	13.2	13.1	12.6	12.1	11.2	10.6	9.4	7.8	6.5	10.7	9.7	9.4	8.8	10.5	8.8
	5	21.8	10.7	10.5	18.9	21.8	15.8		22.2	16.1	24.9	18.8	17.1	20	18.9	28.6	27.8	11.8	8	13	18.7	19.6	19.1	22.6	14.6
	15	25.5	21.1	22.8	22.7	17	12.5		20	25.2	29.9	28.9	30.3	33.2	25.4	28.8	26.6	28.9	23.3	23.8	27.1	24.4	22.9	21.8	20.4
	30	17.2	16.4	19.3	17.8	12.5	10.3		17.7	25.8	28	30.7	31.4	31.1	27.6	28.8	27.1	27.4	17.3	22.1	24.6	20.2	23.6	23.1	21
	60	12	11.2	15.7	12.2	9.7	9.1		12.3	18.7	23.8	30.7	31.4	30.4	25.2	24.8	21.1	14.3	11.7	31.7	15.9	23.4	21.6	26.5	24
	120	7.3	7.7	10.4	8.2	7.3	6.7		8.6	10.9	13.4	23.4	20.4	14.4	12.2	17.5	13.1	8.9	7.5	15.6	8.6	9.4	10.5	12.2	8.9
	Blood glucose AUC (mM × min)
	LFCD	HFCD	HFCD+FGF21
	1656	2215.75	1996.25
	1471.75	2696.5	1508.25
	1844.25	3309.25	2813.5
	1644	3270	2030.25
	1334.5	3095	2265
	1139	2608.25	2269.5
		2890	2546.5
	1648.25	2516.75	2206

## Sheet: Figure 3C
	Figure 3C
	Plasma Inuslin (ng/mL)																										HOMA-IR
	Time (min)	LFCD								HFCD								HFCD+FGF21									LFCD	HFCD	HFCD+FGF21
	0	0.357	0.585	0.608	0.446	0.597	0.598	0.582	0.664	1.114	0.993	1.377	1.013	1.466	1.455	1.025	0.813	0.262	0.21		0.321	0.238	0.38	0.312	0.113		3.08408	13.4361	2.28813
	15	0.386667	1.038	1.006	0.822	1.115	0.859		1.202	2.704	1.658	1.842	1.833	2.813	2.104	2.007	1.509	0.713	1.035	0.834	0.783	0.65125	0.57875	0.55875	0.3675		4.5825	19.1939	1.27867
																											6.48533	15.0768	7.60373
																											4.49221	18.03	3.28133
																											5.31556	16.6112	3.54033
																											4.8694	9.86847	2.81667
																											5.53333	9.08302	0.877633

## Sheet: Figure 3D
	Figure 3D
	Fasting plasma TG (mM)
	Time (weeks)	LFCD																		HFCD																		HFCD+FGF21
	-1	1.917	2.094	1.815	1.668	1.638	1.32	1.467	2.247	2.037	1.989	1.968	2.022	2.43	2.196	1.704	1.716	2.118	1.401	1.785	1.545	1.686	1.467	2.178	2.235	1.635	2.592	1.989	2.73	1.878	1.884	2.229	2.436	1.968	2.124	2.013	2.526	2.784	2.121	2.103	2.247	2.181	1.716	1.848	1.83	1.629	1.839	1.626	1.461
	4	1.476	1.896	1.752	1.551	1.566	2.043	1.998		2.37	1.899	1.542	1.575	2.535	2.07	1.743	1.584	2.01	1.695	1.212	0.996	1.647	1.053	1.071	1.314		1.038	1.05	0.849	1.425	1.686	1.206	1.383	1.146	1.515	1.332	1.899	0.879	0.789	0.777	0.675	0.501	0.636	0.363	0.66	0.564	1.089	0.96	0.285
	8	1.14	1.7	1.535	1.665	1.535	2.15	1.715	2.25	1.74	2.085	1.985	2	1.145	1.85	1.675	1.44	2.335	1.46	0.73	0.8	0.98	0.965	0.72	0.98	2.45	1.56		0.76	1.55	2.075	0.81	1.25	0.84	0.895	0.855	1.275		0.44	0.49	0.68	0.49	0.465	0.655	0.42	0.635	0.36	0.79	0.285
	12		1.525	1.735	1.37		2.07	1.625	2.33	2.105	2	1.245	1.68	1.76	1.62	1.41	1.835	1.91	1.22		3.265		0.83		1.29			1.065	0.84	2.05	2.135	1.29	2.25		1.075	0.93	2.205		0.565	0.515	0.59	0.89	0.425	0.51	0.345	0.46	0.085	0.42	0.365
	16	0.965	1.315	2.1	1.78	2.06	1.865	1.73		1.565	1.245	1.905	1.985	2.26	1.685	1.465	1.3	1.845	1.31	0.875	0.995	1.93	0.84	0.655	0.735	1.295	2.79	1.035		1.59	1.735	1.44	2.545	1.29	1.155	1.09	1.895		0.615	0.58	0.485	0.355	0.405	0.495		0.55	1.055	0.545	0.775
	20	1.11	2.165	1.5	2.725	1.44	1.805	1.215	1.505	1.585	1.935	1.925	1.46	1.97	1.61	1.7	1.435	2.105	1.685	1.015	0.465	1.825	1.04	0.805	1.265	1.805	3.115	0.885	1.32	2.115	2.225	1.295	0.52	1.025	1.14	0.835	1.555		1.17	0.51	0.485	0.395	0.705	0.775	0.44	0.52	0.69		0.415
	22	1.23	1.94	2.455		2.125	1.75	1.44	2.08	1.91	2	1.56	1.45	1.91	1.85	1.39	1.275	2.715	2.015	1.595	1.16	2.315	0.725	0.525	0.795	1.73	3.35	1.155	0.85	1.955	1.55	1.245	2.66	1.23	1.045	0.71	1.225		0.615	0.585	0.485	0.51	0.58	0.725	0.41	0.725		0.47	0.655
	Plasma lipoprotein TG (mM)
	Fraction	LFCD	HFCD	HFCD+FGF21
	0
	1	0.01	0	0
	2	0.02	0	0
	3	0.04	0.01	0.02
	4	0.23	0.17	0.09
	5	0.31	0.22	0.05
	6	0.23	0.14	0.03
	7	0.17	0.1	0.02
	8	0.14	0.06	0.02
	9	0.11	0.05	0.01
	10	0.1	0.04	0
	11	0.09	0.02	0
	12	0.05	0.02	0.01
	13	0.06	0.01	0
	14	0.02	0	0
	15	0.01	0	0
	16	0.02	0.01	0
	17	0.02	0.04	0.02
	18	0.04	0.05	0.03
	19	0.02	0.02	0.02
	20	0.04	0.03	0.04
	21	0.05	0.02	0.02
	22	0.02	0.01	0.01
	23	0.02	0.01	0.01
	24	0	0	0
	25	0	0	0
[truncated: 6 more columns]

## Sheet: Figure 3E
	Figure 3E
	Plasma TG (Mm)
	Time (hours)	LFCD								HFCD										HFCD+FGF21
	0	1.5	1.44	1.935	1.46	1.97	1.61	1.7	1.435	1.015	0.465	1.825	1.04	0.805	1.265	1.805	3.115	2.115	2.225	1.17	0.485	0.415	1.17	0.405	0.69	0.485	0.665	0.555
	1	1.95	1.54	2.99	2.025	2.66	3.62	1.365	2.785	1.995	2.415	2.42	2	1.35	1.345	1.95	2.68	2.545	4.845	0.615	2.195	0.56	1.375	0.98	1.03	1.885	0.95	0.93
	2	1.725	2.645	3.635	4.255	2.195	1.91	4.745		3.16	2.44	7.725	3.525	2.215	2.995	7.515	3.2		7.3	2.3	1.125	1.12	1.385	2.185	1.265	1.945	2.415	1.43
	3	2.125	2.025	3.4	3.445			4.365	3.15	3.52	2.05	7.64	4.025	2.755	3.68	6.675	4.575	6.55	7.89	2.37	1.065	1.185	1.32	1.09	1.775	2.46	3.355	1.23
	4	1.51	2.1	3.12	2.035	3.34	1.85		1.91	3.95	1.5		2.96	1.615	3.13	5.255	6.01	8.69	11.765	2.225	1.175	0.775	1.48	1.48	1.38		2.03	1.49
	8	1.135	1.08	1.745	1.85	1.025	2.555	1.475	1.15	1.335		3.461	1.665	1.43	1	4.215	5.67	5.795	6.58	1.46	1.13	1.62	0.66	1.43	1.36	1.105	1.3	1.48
	Plasma TG AUC (mM × hours)
		LFCD	HFCD	HFCD+FGF21
		12.595	21.728	14.353
		14.34	42.63	9.825
		22.283	20.8	8.25
		19.243	13.62	9.685
		19.008	18.478	11.018
		17.95	38.61	10.585
		23.743	38.378	14.215
		16.695	48.015	14.728
			63.72	10.553
