# Supplementary material for: FGF21 protects against hepatic lipotoxicity and macrophage activation to attenuate fibrogenesis in nonalcoholic steatohepatitis
Source: eLife. 2023 Jan 17;12:e83075. doi: 10.7554/eLife.83075 (PMC9928421; doi:10.7554/eLife.83075)
Supplement: Figure 4—figure supplement 1—source data 1. [file elife-83075-fig4-figsupp1-data1.xlsx]

## Sheet: Figure 4-figure supplement 1A
	Figure 4-figure supplement 1A
	Lipid-positive area in the liver (relative to LFCD group)
	LFCD	HFCD	HFCD+FGF21
	0.210149	7.66133	1.63751
	0.402512	11.8241	0.398981
	0.16451	30.0029	0.389272
	0.378712	3.52401	1.32981
	0.514714	4.91881	0.773983
	2.67361	13.3183	1.08968
	1.5988	20.6588	0.687854
	2.11428	19.8646	0.189045
	1.12554	13.1072	0.0469467
	0.407874	17.0504	0.829446
	0.214595	27.9932	0.618186
	0.190925	20.1996	3.39443
	0.856368	9.9221	3.70434
	1.59109	24.6942	0.0533545
	3.54127	23.3121	0.316743
	0.704462	11.6787	0.333662
	0.458351	17.58	0.362889
	0.852233	10.528	1.73938

## Sheet: Figure 4-figure supplement 1B
	Figure 4-figure supplement 1B
	Inflammatory foci in the liver (number/mm2)
	LFCD	HFCD	HFCD+FGF21
	1.62	1.8	5.18
	2.61	1.13	0.77
	0.3	5.22	0.07
	1.44	1.09	0.28
	0.67	1.19	1.84
	0.81	16.62	1.55
	1.31	2.33	0.7
	0.6	10.26	0.29
	2.4	6.11	0.09
	1	0.77	5.66
	0.77	8.91	1.22
	0.94	2.98	4.91
	0.38	2.53	4.26
	0.4	5.78	1.06
	1.71	3.6	2.67
	0.87	1.03	1.01
	1.11	2.17	0.54
	1.67	1.4	0.62
