# Supplementary material for: FGF21 protects against hepatic lipotoxicity and macrophage activation to attenuate fibrogenesis in nonalcoholic steatohepatitis
Source: eLife. 2023 Jan 17;12:e83075. doi: 10.7554/eLife.83075 (PMC9928421; doi:10.7554/eLife.83075)
Supplement: Figure 4—source data 1. [file elife-83075-fig4-data1.xlsx]

## Sheet: Figure 4A
	Figure 4A
	Liver weight (g)
	LFCD	HFCD	HFCD+FGF21
	1.691	1.932	1.021
	1.993	1.839	0.96
	1.528	4.284	1.025
	1.71	2.02	0.965
	1.531	1.693	1.014
	1.996	2.312	1.278
	2.093	3.538	1.302
	1.968	3.045	0.851
	1.927	2.414	0.947
	1.613	2.161	1.165
	1.596	3.457	1.08
	1.534	3.224	1.59
	1.92	2.939	1.594
	2.072	2.952	0.938
	2.072	4.063	0.909
	2.118	2.361	1.145
	2.149	2.021	1.212
	2.02	2.457	1.27

## Sheet: Figure 4B
	Figure 4B
	Steatosis score (0-3)				Lobular inflammation score (0-2)				Ballooning score (0-2)
	LFCD	HFCD	HFCD+FGF21		LFCD	HFCD	HFCD+FGF21		LFCD	HFCD	HFCD+FGF21
	0	0.22	0.89		1.33	0.78	2		0	0.11	0.22
	0	1.5	0		1.75	1.25	0.78		0	0	0
	0	2.89	0		0.44	1.78	0.13		0	2	0.13
	0	1	0		1.44	1	0.33		0	0.67	0
	0	1.22	0		0.78	1.11	1.5		0	0.22	0.13
	0	3	0		1	2	1.14		0	2	0
	0	3	0		1	1.63	0.89		0	2	0
	0	3	0		0.86	2	0.38		0	2	0
	0	3	0		2	1.89	0.11		0	2	0
	0	3	0.5		0.89	0.89	2		0	2	0.38
	0	3	0		0.67	2	1.38		0	2	0
	0	3	0.75		1	1.67	2		0	2	0.38
	0	3	0		0.5	1.56	1.67		0	2	0.78
	0	3	0		0.44	2	1		0	1.67	0
	0	3	0		1.33	1.67	1.88		0.44	2	1
	0	3	0		1	1	0.75		0	1.56	0
	0	3	0		1.22	1.56	0.67		0	2	0
	0	3	0		1.56	1.22	0.67		0	1.67	0

## Sheet: Figure 4C
	Figure 4C
	NAFLD activity score
	LFCD	HFCD	HFCD+FGF21
	1.33	0.78	2
	1.75	1.25	0.78
	0.44	1.78	0.13
	1.3	1.11	3.11
	1.75	2.75	0.78
	0.44	6.67	0.25
	1.44	2.67	0.33
	0.78	2.56	1.44
	1	7	1.14
	1	6.63	0.89
	0.86	7	0.38
	2	6.89	0.11
	0.89	5.89	2.88
	0.67	7	1.38
	1	6.67	3.13
	0.5	6.56	2.44
	0.44	6.67	1
	1.78	6.67	2.88
	1	5.56	0.75
	1.22	6.56	0.67
	1.56	5.89	0.67

## Sheet: Figure 4D
	Figure 2D
	Sirus Red-positive area (relative to LFCD group)
	LFCD	HFCD	HFCD+FGF21
	1.05611
	2.73333	0.534741	0.399449
	1.72332	1.5063	0.780037
	0.709438	1.75474	0.67626
	0.17323	2.21684	1.29536
	0.560966	3.01354	0.227011
	0.542392	2.34086	0.993892
	0.533942	5.92503	0.283276
	1.41372	0.74012	0.167887
	0.163164	0.703566
	0.113593	1.95261	0.467119
	0.250089	1.08495	2.7895
	0.67042	0.8122	1.65813
	1.21759	3.95159	2.15689
	0.553155	3.86419	0.35058
	0.984359	1.38742	0.203108
	1.48246	2.96536	1.27403
	3.11872	2.41621	0.866161

## Sheet: Figure 4E
	Figure 4E
	Hydroxproline (µg/liver)
	LFCD	HFCD	HFCD+FGF21
	81.3722	96.3945	66.7477
	97.1278	66.7956	47.1778
	55.8121	156.478	92.5952
	126.485	98.1681	55.321
	63.2314	118.07	60.6883
	78.8949	92.6465	70.3016
	95.8617	177.248	74.8179
	113.223	103.955	46.9868
	102.189	94.1002	71.6631
	93.019	92.0505	50.0219
	80.9362	198.652	64.0492
	88.9862	137.77	93.319
	70.9159	123.587	71.92
	145.632	147.89	49.9982
	104.793	237.077	46.0971
	115.643	129.715	64.4688
	101.064	102.627	73.1998
	87.8351	120.746
