# Supplementary material for: FGF21 protects against hepatic lipotoxicity and macrophage activation to attenuate fibrogenesis in nonalcoholic steatohepatitis
Source: eLife. 2023 Jan 17;12:e83075. doi: 10.7554/eLife.83075 (PMC9928421; doi:10.7554/eLife.83075)
Supplement: Figure 5—figure supplement 2—source data 1. [file elife-83075-fig5-figsupp2-data1.xlsx]

## Sheet: Figure 5-figure supplement 2A
	Figure 5-figure supplement 2A
	Hepatic gene expression (relative to LFCD group)
	Cd36
	LFCD	HFCD	HFCD+FGF21
	0.66	0.96	4.78
	1.26	0.92	1.99
	1.18	1.55	2.92
	1.04	2.42	2.52
	0.77	1.98	2.23
	0.9	1.42	2.58
	0.94	2.44	2.58
	1.24	2.92	1.54
	0.61	2.58	1.99
	1.44	4.44	3.63
	1.07	3.29	2.78
	1.22	3.25	2.09
	1.18	3.12	1.5
	1.09	4	2.36
	0.91	1.92	2.74
	0.85	2.06	2.71
	0.8		4.02
	0.84		3.8

## Sheet: Figure 5-figure supplement 2B
	Figure 5-figure supplement 2B
	Hepatic gene expression (relative to LFCD group)
		LFCD																		HFCD																HFCD+FGF21
	Mttp	0.57	0.66	1.01	1.47	1.05	0.91	0.95	1.38	1.01	0.98	1.02	1.21	1.16	0.95	0.85	0.87	0.96	1	0.83	0.78	0.51	0.72	1.12	1.11	0.92	0.96	1.01	0.99	1.13	1.11		1.28	1.07	0.94	1.07	1.01	1.33	1.22	1.08	1.22	1.05	1.13	0.93	1.11	0.98	1	1.06	1.07
	ApoB	0.72	0.76	1.05	1.82	1.08	0.89	0.59	1.09	0.95	1.06	1.06	1.22	1.04	0.9	0.9	0.93	0.93	1.01	0.68	0.69	0.72	0.81	0.88	0.77	0.84	0.99	1.11	1.07	1.03	1.01	0.75	1.24	0.86	1.09	1.01	1.34	1.17	1.26	1.08	1.21		1.13	1.4	1.47	1.39	1.14	1.33	1.34
[truncated: 4 more columns]
