# Supplementary material for: FGF21 protects against hepatic lipotoxicity and macrophage activation to attenuate fibrogenesis in nonalcoholic steatohepatitis
Source: eLife. 2023 Jan 17;12:e83075. doi: 10.7554/eLife.83075 (PMC9928421; doi:10.7554/eLife.83075)
Supplement: Figure 5—source data 1. [file elife-83075-fig5-data1.xlsx]

## Sheet: Figure 5A
	Figure 5A
	Hepatic lipid (nmol/mg protein)
		LFCD																		HFCD																		HFCD+FGF21
	TG	211.78	206.473	182.462	138.841	164.65	293.881	217.63	184.15	71.3273	166.766	179.731	123.38	147.426	92.4053	84.2822	91.9569	105.457	71.4543	424.481	405.959	598.608	913.47	627.38	714.079	595.257	901.885	179.516	186.897	926.17	650.095	715.485	620.213	543.609	448.633	398.438	363.513	211.563	201.28	562.507	244.309	339.479	234.09	496.908	198.649	94.1553	198.477	119.674	232.619
	TC	69.346	70.9821	54.1254	55.2102	56.6045	73.9183	56.192	69.9723	27.7384	27.252	38.7044	44.6065	38.1911	22.5189	23.4229	27.4216	39.1767	32.2366	146.159	117.333	130.978	186.399	130.558	214.324	135.876	195.766	65.7521	48.2874	225.989	101.943	166.754	132.521	141.834	108.73	94.1964	93.786	61.9678	108.286	194.08	123.766	131.013	97.7054	153.886	92.3091	76.9858	145.597	112.041	92.8629
	PL	170.173	149.107	150.748	151.421	142.276	178.524	172.969	189.114	152.231	126.498	142.139	199.068	150.095	124.825	116.314	133.562	179.129	140.239	166.886	141.213	161.583	248.532	157.588	262.623	145.679	231.198	83.07	58.2911	184.139	145.115	161.236	145.083	132.343	116.958	141.964	124.617	111.368	140.731	232.193	173.424	217.13	170.632	228.117	122.217	139.941	145.131	136.303	127.386
[truncated: 6 more columns]

## Sheet: Figure 5B
	Figure 5B
	Hepatic gene expression (relative to LFCD group)
		LFCD																		HFCD																HFCD+FGF21
	Cpt1α	1.14	1.11	0.87	0.98	0.67	0.73	1.03	1.46	0.85	1.15	1.15	1.27	1.19	0.85	0.76	0.93	0.75	1.1	1.14	0.72	0.83	0.86	1.05	0.84	0.85	1.06	1.63	1.38	1.13	1.17	1.19	1.47	0.9	1.11	1.31	1.72	1.77	0.92	1.41	1.85	1.56	1.33	1.74	2.43	1.71	1.43	1.87	1.9
	Pparα	0.81	1.03	1.08	0.69	0.99	0.85	1.07	1.48	0.79	1	0.97	1.31	1.33	1.05	0.72	0.85	0.93	1.05	0.72		0.69	0.86	0.96	1.05	1.17	1.14	1.29	1.01	1.41	1.55	0.8	1.4	1.12	1.24	1.8	1.59	1.23	1.39	1.55	2.11	1.52	1.49	1.36	2.05	2.06	1.66	1.45	1.72
	Pgc1α	0.59	1	1.55	1.13	1.13	0.86	0.85	0.89	0.69	1.11	0.72	1.1	1.54	1.37	0.67	0.97	0.82	1.03	0.73	0.62	1.1	0.94	0.62	0.46	1.01	1.07	0.91	1.1	1.08	1.1	0.96	0.73	0.73	1.04	2	2.78	2.35	4.23	3.24	2.99	2.45	1.83	3.77	5.1	2.93	1.77	1.82	2.66
[truncated: 4 more columns]

## Sheet: Figure 5C
	Figure 5C
	Hepatic Abcg5 gene expression (relative to LFCD group))
	LFCD	HFCD	HFCD+FGF21
	0.83	2.8	2.25
	0.54	1.51	5.5
	1.16	1.88	4.55
	1.23	2.17	7.42
	1.26	2.57	7.86
	1.07	3.61	5.2
	0.89	3.32	6.48
	1.03	6.75	6.7
	0.79	1.88	6.77
	1.1	3.87	8.18
	1.04	3.79	12.86
	0.95	5.13	6.13
	1.29	1.96	7.53
	0.92	3.29	9.66
	0.94	4.8	5.17
	1.02	4.77	8.63
	0.89		9.04
	1.05		8.17

## Sheet: Figure 5D
	Figure 5D
	Hepatic gene expression
		LFCD																		HFCD																HFCD+FGF21
	Cyp7a1	0.68	0.78	0.68	0.43	0.58	0.94	1.04	2.87	0.85	1.36	1.29	1.36	1.19	0.77	0.75	0.61	0.54	1.28	1.01	0.83	0.55	0.66	1.38	0.75	1.25	0.9	1	0.81	0.96	1.95	0.18	1.07	0.35	1.25	0.95	2.06	1.64	1.77	0.88	2.77	2.52	2.48	1.27	1.46	1	1.57	4.78	0.92
	Cyp8b1	1.19	0.86	0.86	0.91	0.96	0.94	0.95	1.32	0.54	0.96	1.11	0.96	1.43	1.67	0.88	0.93	0.59	0.94	0.5		0.31	0.41	0.51	0.45	0.38	0.26	0.54	0.48	0.6	0.82	0.29	0.53	0.65	0.61	0.4	0.7	0.41	0.11	0.48	0.44		1.42	0.57	0.46	0.55	0.74	1.18	1.43
	Cyp27a1	1.1	0.69	0.86	1.23	1.03	0.93	1.2	0.96	0.75	1.07	1.02	1.14	1.26	1.05	0.94	1.01	0.87	0.91	0.58	0.33	0.52	0.57	0.74	0.51	0.65	1.17	0.82	0.69	0.78	0.82	0.6	0.83	0.68	0.76	0.69	0.92	0.73	1.28	1.51	0.8	0.97	1.4	0.88	0.86	0.86	0.77	0.86	1.1
[truncated: 4 more columns]
