# Supplementary material for: FGF21 protects against hepatic lipotoxicity and macrophage activation to attenuate fibrogenesis in nonalcoholic steatohepatitis
Source: eLife. 2023 Jan 17;12:e83075. doi: 10.7554/eLife.83075 (PMC9928421; doi:10.7554/eLife.83075)
Supplement: Figure 6—figure supplement 1—source data 1. [file elife-83075-fig6-figsupp1-data1.xlsx]

## Sheet: Figure 6-figure supplement 1B
	Figure 6-figure supplement 1B
	CD45+ cells (× 106)				Eosinophils ( (× 106)				Neutrophils (× 106)				B cells (× 106)				DCs (× 106)
	LFCD	HFCD	HFCD+FGF21		LFCD	HFCD	HFCD+FGF21		LFCD	HFCD	HFCD+FGF21		LFCD	HFCD	HFCD+FGF21		LFCD	HFCD	HFCD+FGF21
	9.42	8.29	8.9		0.36	0.21	0.32		0.48	0.63	0.83		4.76	2.19	3.44		0.34	0.72	0.49
	9.71	6.18	12.58		0.3	0.15	0.45		0.76	0.28	0.66		4.36	1.06	4.53		0.34	0.37	0.82
	11.71	7.01	10.16		0.42	0.26	0.42		0.95	0.61	0.69		4.4	1.38	3.15		0.49	0.5	0.61
	6.41	4.87	11.7		0.31	0.17	0.33		0.74	0.38	0.68		2.24	0.85	4.29		0.2	0.38	0.77
	4.7	5.19	8.72		0.07	0.16	0.39		0.49	0.22	0.76		1.52	0.98	2.82		0.17	0.36	0.54
	T cells (× 106)				NK cells (× 106)				KCs (× 106)				Ly6chi monocytes (× 106)				MoDMacs (× 106)
	LFCD	HFCD	HFCD+FGF21		LFCD	HFCD	HFCD+FGF21		LFCD	HFCD	HFCD+FGF21		LFCD	HFCD	HFCD+FGF21		LFCD	HFCD	HFCD+FGF21
	1.01	1.43	1.74		0.6	0.59	0.41		0.35	0.21	0.34		0.62	0.99	0.46		0.021	0.218	0.027
	1.44	1.37	2.25		0.53	0.43	0.74			0.15	0.52			1.25	0.91			0.238	0.191
	1.9	1.26	1.69		0.98	0.47	0.59		0.3	0.25	0.6		0.97	1.01	1.08		0.116	0.278	0.187
	0.88	0.86	2.01		0.41	0.39	0.65		0.4	0.22	0.98		0.38	0.55	0.52		0.135	0.108	0.09
	0.73	1.1	1.29		0.19	0.39	0.61		0.31	0.25	0.33		0.42	0.86	0.87		0.086	0.136	0.072
