# Supplementary material for: FGF21 protects against hepatic lipotoxicity and macrophage activation to attenuate fibrogenesis in nonalcoholic steatohepatitis
Source: eLife. 2023 Jan 17;12:e83075. doi: 10.7554/eLife.83075 (PMC9928421; doi:10.7554/eLife.83075)
Supplement: Figure 6—figure supplement 2—source data 1. [file elife-83075-fig6-figsupp2-data1.xlsx]

## Sheet: Figure 6-figure supplement 2A
	Figure 6-figure supplement 2A
	CD9 geoMFI in ResKCs	LFCD	HFCD	HFCD + FGF21		CD9 geoMFI in ResKCs	LFCD	HFCD	HFCD + FGF21
	1482	0.444444				1482	145.632
	2327	1.77778				2327	104.792
	1969	1				1969	115.643
	2304	1.22222				2304	101.064
	1992	1.55556				1992	87.8351
	3337		6.625			3337		177.247
	4191		6.66667			4191		237.077
	3512		5.55556			3512		129.715
	2183		6.55556			2183		102.627
	2487		5.88889			2487		120.746
	1204			1.375		1204			50.0218
	1334			3.125		1334			64.0492
	2804			2.44444		2804			93.319
	3770			0.666667		3770			64.4688
	3193			0.666667		3193			73.1998

## Sheet: Figure 6-figure supplement 2B
	Figure 6-figure supplement 2B
	CD36 geoMFI in ResKCs	LFCD	HFCD	HFCD + FGF21		CD36 geoMFI in ResKCs	LFCD	HFCD	HFCD + FGF21
	493	0.444444				493	145.632
	1310	1.77778				1310	104.792
	766	1				766	115.643
	1120	1.22222				1120	101.064
	1079	1.55556				1079	87.8351
	2360		6.625			2360		177.247
	2500		6.66667			2500		237.077
	1860		5.55556			1860		129.715
	1242		6.55556			1242		102.627
	1611		5.88889			1611		120.746
	0			1.375		0			50.0218
	0			3.125		0			64.0492
	0			2.44444		0			93.319
	140			0.666667		140			64.4688
	387			0.666667		387			73.1998

## Sheet: Figure 6-figure supplement 2C
	Figure 6-figure supplement 2C
	CD9 geoMFI in MoKCs	LFCD	HFCD	HFCD + FGF21		CD9 geoMFI in MoKCs	LFCD	HFCD	HFCD + FGF21
	1927	0.444444				1927	145.632
	1731	1.77778				1731	104.792
	2494	1				2494	115.643
	2701	1.22222				2701	101.064
	2327	1.55556				2327	87.8351
	3053		6.625			3053		177.247
	3233		6.66667			3233		237.077
	3964		5.55556			3964		129.715
	2999		6.55556			2999		102.627
	2385		5.88889			2385		120.746
	1372			1.375		1372			50.0218
	1951			3.125		1951			64.0492
	1778			2.44444		1778			93.319
	1268			0.666667		1268			64.4688
	1567			0.666667		1567			73.1998

## Sheet: Figure 6-figure supplement 2D
	Figure 6-figure supplement 2D
	CD36 geoMFI in MoKCs	LFCD	HFCD	HFCD + FGF21		CD36 geoMFI in MoKCs	LFCD	HFCD	HFCD + FGF21
	0	0.444444				0	145.632
	455	1.77778				455	104.792
	409	1				409	115.643
	646	1.22222				646	101.064
	688	1.55556				688	87.8351
	1336		6.625			1336		177.247
	1921		6.66667			1921		237.077
	2040		5.55556			2040		129.715
	519		6.55556			519		102.627
	1036		5.88889			1036		120.746
	0			1.375		0			50.0218
	0			3.125		0			64.0492
	0			2.44444		0			93.319
	14			0.666667		14			64.4688
	20.2			0.666667		20.2			73.1998

## Sheet: Figure 6-figure supplement 2E
	Figure 6-figure supplement 2E
	CD9 geoMFI in ResKCs	LFCD	HFCD	HFCD + FGF21
	1482	0.0197416
	2327	0.0136742
	1969	0.0291534
	2304	0.038109
	1992	0.0355888
	3337		0.0520169
	4191		0.0364174
	3512		0.0258196
	2183		0.0283202
	2487		0.03563
	1204			0.0109802
	1334			0.0240709
	2804			0.0207884
	3770			0.0239964
	3193			0.0203628
