# Supplementary material for: FGF21 protects against hepatic lipotoxicity and macrophage activation to attenuate fibrogenesis in nonalcoholic steatohepatitis
Source: eLife. 2023 Jan 17;12:e83075. doi: 10.7554/eLife.83075 (PMC9928421; doi:10.7554/eLife.83075)
Supplement: Figure 6—source data 1. [file elife-83075-fig6-data1.xlsx]

## Sheet: FIG. 6B
	Figure 6B
	ResKCs (× 106)				CD11C+ ResKCs (% ResKCs)				ResKCs (geoMF)
	LFCD	HFCD	HFCD+FGF21		LFCD	HFCD	HFCDFGF21			LFCD					HFCD					HFCD+FGF21
	0.088	0.034	0.07		7.18	17	13.2		CD36	493		766	1120	1079	2360	2500	1860	1242	1611	0	0	0	140	387
		0.019	0.184			37.9	8.5		CD9	1482		1969	2304	1992	3337	4191	3512	2183	2487	1204	1334	2804	3770	3193
	0.108	0.022	0.161		16.5	37.4	9.55
	0.163	0.058	0.287		11.9	16	15.5
	0.165	0.049	0.061		12.5	26.1	16

## Sheet: FIG. 6C
	Figure 6C
	MoKCs (×106)				CD11c+MoKCs (% MoKCs)				MoKCs (geoMFI)
	LFCD	HFCD	HFCD+FGF21		LFCD	HFCD	HFCD+FGF21			LFCD					HFCD					HFCD+FGF21
	0.26	0.172	0.264		7.18	17	13.2		CD36	0	455	409	646	688	1336		2040	519	1036	0	0	0	14	20.2
		0.133	0.333			37.9	8.5		CD9	1927	1731	2494	2701	2327	3053		3964	2999	2385	1372	1951	1778	1268	1567
	0.191	0.224	0.434		16.5	37.4	9.55
	0.236	0.164	0.688		11.9	16	15.5
	0.138	0.196	0.262		12.5	26.1	16

## Sheet: FIG. 6D
	Figure 6D
	Hepatic gene expression (relative to LFCD)
		LFCD																		HFCD																HFCD+FGF21
	Adgre1	1.28	1.19	0.6	0.83	1.14	0.75	0.85	0.8	0.77		1.19	2.05	1.24	0.36	1.36	0.41	1.2		1.48	1.81	1.83	3.45	2.6	1.08	1.48	2.14	0.99	3.38	1.25	1.52	0.91	2.02	1.69	1.7	2.85	3.91	1.09	0.61	2.42	1.58	1.49	1.03	2.07	2.7	2.88	1.88	1.23	1.91
	Tnfα	1.2	1.57	0.89	0.61	0.4	0.29	1.33	1.7	0.74	1.66	0.62	2.26	0.67	0.5	1.17	0.65	0.91	0.83	1.28	1.74	1.05	4.13	3.27		2.7	5.6	0.99	2.87	3.71	2.6	4.44	2.21	0.53	0.83		1.44	1.43	1.22	0.55	1.22	1.35	0.77	1.37	3.04	0.62	3.07	0.96	2.1
	Il1b	0.52	2.84	0.66	0.64	0.52	0.22	0.8	1.81	0.62	1.48	0.83	1.41	0.37	0.62	0.65	0.33	1.91	1.79	0.66	3.32	1.15	1.6	2.38		2.13	3.14	0.72	2	0.82	0.96	1.04	1.34	0.55	0.96	1.57	1.35	0.58	0.58	0.6	0.84	1.78	1.21	0.67	0.98	1.19	0.8	0.46	0.82
	Ccl2	1.34	2.07	0.62	0.57	0.22	0.76	1.27	1.14	0.56	2.46	0.32	2.77	0.23	0.29	0.81	0.63	1.23	0.71	1	0.99	1.1	3.93	2.24		2.88	5.3	1.23	1.76	1.1	1.25	6	2.77	0.97	1.01	1.86	1.91	0.71	0.66	0.97	0.41	1.29	0.63	0.83	1.73	0.62	1.11	0.85	1.11
	Hepatic CLSs (number/mm2)
	LFCD	HFCD	HFCD+FGF21
	0.883256	1.8651	0.122705
	1.42632	7.99056	0.694135
	0.446718	32.8403	0.613726
	2.79778e-12	6.37599	0.0878965
	0.593621	4.44372	1.02159
	1.32966	47.6744	0.977717
	0.471706	3.36248	0.721136
	1.31936	21.2623	0.258825
	1.55465	17.5445	0.713123
	0.231583	1.09146	3.0037
	0.27607	26.9809	0.227195
	0.59351	5.95042	3.31221
	0.931703	24.3061	1.09629
	0.103597	8.55988	0
	0.348361	5.71238	0.873919
	0.323995	9.37309	0.638446
	0	6.05346	1.66867
	0.275691
	Hepatic gene expression (relative to LFCD group)
		LFCD																HFCD																	HFCD+FGF21
	Col1a1	0.72	2.78	1.45	0.59	0.32	0.82	0.63	0.49	1.47	0.93	2.18	0.45	0.71	0.54	0.92	1	0.51	0.34	1.55	5.59	0.95	0.93	1.83	2.31	0.68	1.08	2.94	3.69	2.06	5.01	1.49	0.35	0.55	0.89	0.51	1.44	0.24	0.43	0.39	0.65	0.5	0.56	1.09	0.61	1.25	0.94	0.8	1.39
	Acta2	0.44	2.76	3.84	0.85	0.51	0.65	0.54	0.35	0.36	0.33	2.68	0.47	0.52	0.78	0.42	0.51	0.48	0.29	0.9	1.03	0.58	0.59	0.75	0.53	3.95	0.21	0.98	4.18	0.73	1.21	1	0.42	0.37	0.62	1.26	0.6	0.8	0.62	0.96	1.23	0.45	0.56	0.55	0.39	0.41		0.55	0.81
	Ctgf	0.59	1.56	1.91	1.66	0.8	1.26	0.92	1.05	0.68	0.98	1.14	0.37	0.69	0.85	0.53		0.37	0.3	1.05	2.04	0.6	0.66	1.53	1.78	1.06	0.95	1.02	1.35	1.69	1.43	0.72	0.89	0.84	0.77	0.72	0.81	0.69	0.76	0.84	1.24		0.44	0.7	0.84	0.6	0.95	1.6	0.74
	Tgfb1	1.2	1.63	0.95	0.59	0.83	1.11	1.27	0.64	1.63	0.8	1.1	1.17	0.65	1.04	0.69	0.7	0.55	0.62	0.8	1.72	1.12	0.92	1.67	1.48	0.68	0.87	0.95	0.84	1.09	1	0.57	0.71	0.42	1.73	1.04	1.47	0.48	1.06	1.5	1.16	1.08	1.03	1.24	0.73	1.24	1.07	1.2	1.01
	COL1A1-positive area (relative to LFCD group)
	LFCD	HFCD	HFCD+FGF21
	1.47	1.31	0.74
	0.76	0.5	0.37
	1.46	0.81	0.58
	1.12	0.83	0.37
	0.77	3.09	0.44
	0.83	2.07	1.3
	1.13	0.68	0.88
	0.7	0.76	0.44
	1	1.47	0.91
	0.78	2.14	1.01
	0.55	1.57	0.96
	0.78	2.06	0.83
	0.54	1.45	0.82
	1.16	1.03	0.6
	1.52	1.13	0.74
	1.42	1.42	0.95
			0.81
[truncated: 4 more columns]

## Sheet: FIG. 6E
	Figure 6E
	The expression of CD36 in ResKCs were plotted against COL1A1 (% of total area)					The expression of CD9 in MoKCs were plotted against COL1A1 (% of total area)					The expression of CD36 in MoKCs were plotted against COL1A1 (% of total area)
	CD36 geoMFI in ResKCs	LFCD	HFCD	HFCD+FGF21		CD9 geoMFI in MoKCs	LFCD	HFCD	HFCD+FGF21		CD36 geoMFI in MoKCs	LFCD	HFCD	HFCD+FGF21
	493	0.0197416				1927	0.0197416				0	0.0197416
	1310	0.0136742				1731	0.0136742				455	0.0136742
	766	0.0291534				2494	0.0291534				409	0.0291534
	1120	0.038109				2701	0.038109				646	0.038109
	1079	0.0355888				2327	0.0355888				688	0.0355888
	2360		0.0520169			3053		0.0520169			1336		0.0520169
	2500		0.0364174			3233		0.0364174			1921		0.0364174
	1860		0.0258196			3964		0.0258196			2040		0.0258196
	1242		0.0283202			2999		0.0283202			519		0.0283202
	1611		0.03563			2385		0.03563			1036		0.03563
	0			0.0109802		1372			0.0109802		0			0.0109802
	0			0.0240709		1951			0.0240709		0			0.0240709
	0			0.0207884		1778			0.0207884		0			0.0207884
	140			0.0239964		1268			0.0239964		14			0.0239964
	387			0.0203628		1567			0.0203628		20.2			0.0203628
