# Supplementary figures and images for: FGF21 protects against hepatic lipotoxicity and macrophage activation to attenuate fibrogenesis in nonalcoholic steatohepatitis
Source: eLife journal article supplement (doi:10.7554/elife.83075), 2023-01-17

Figure 5-figure supplement 1

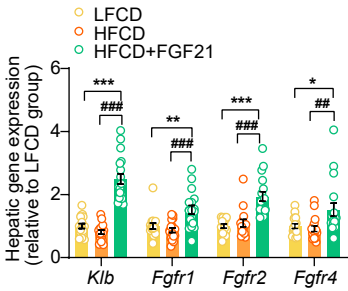

Supplement: supp [file elife-83075-supp-v1.zip]

Figure 4-figure supplement 1

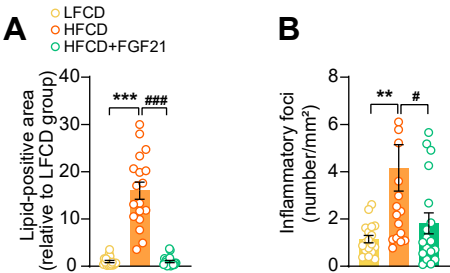

Supplement: supp [file elife-83075-supp-v1.zip]

Figure 6-figure supplement 2

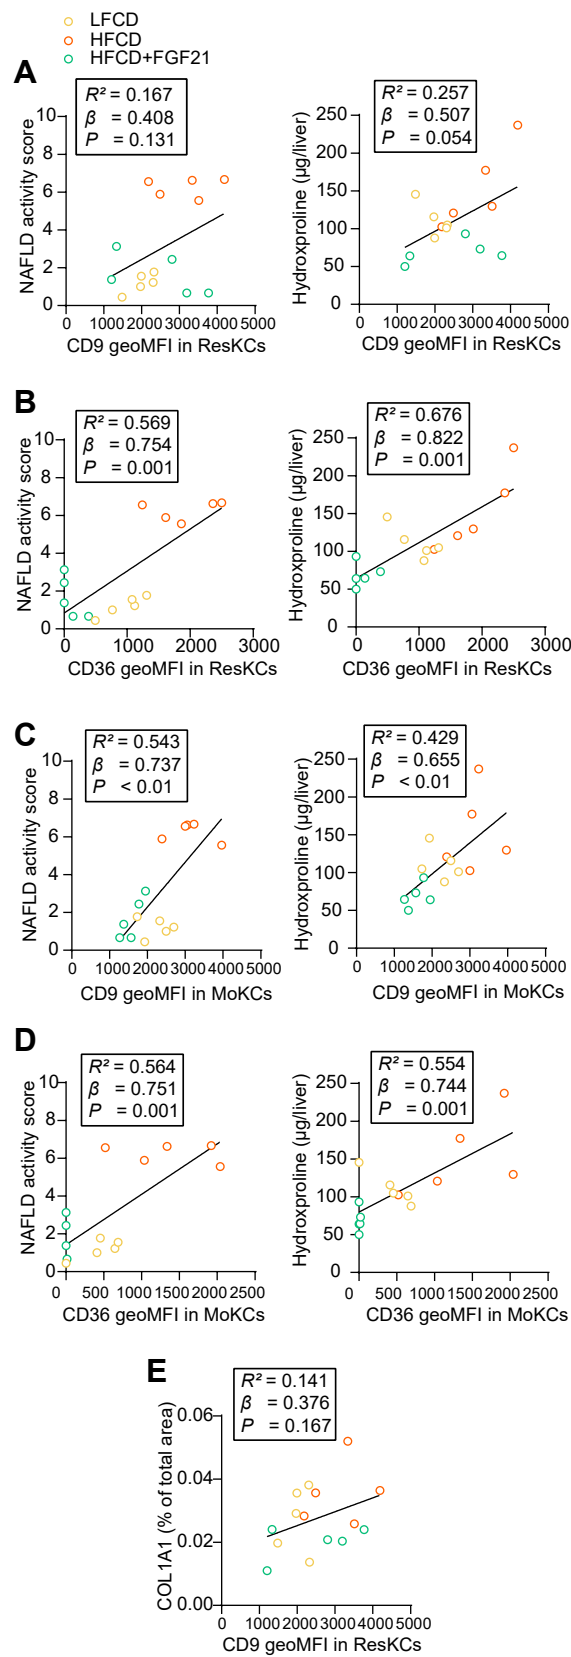

Supplement: supp [file elife-83075-supp-v1.zip]

Figure 6-figure supplement 1

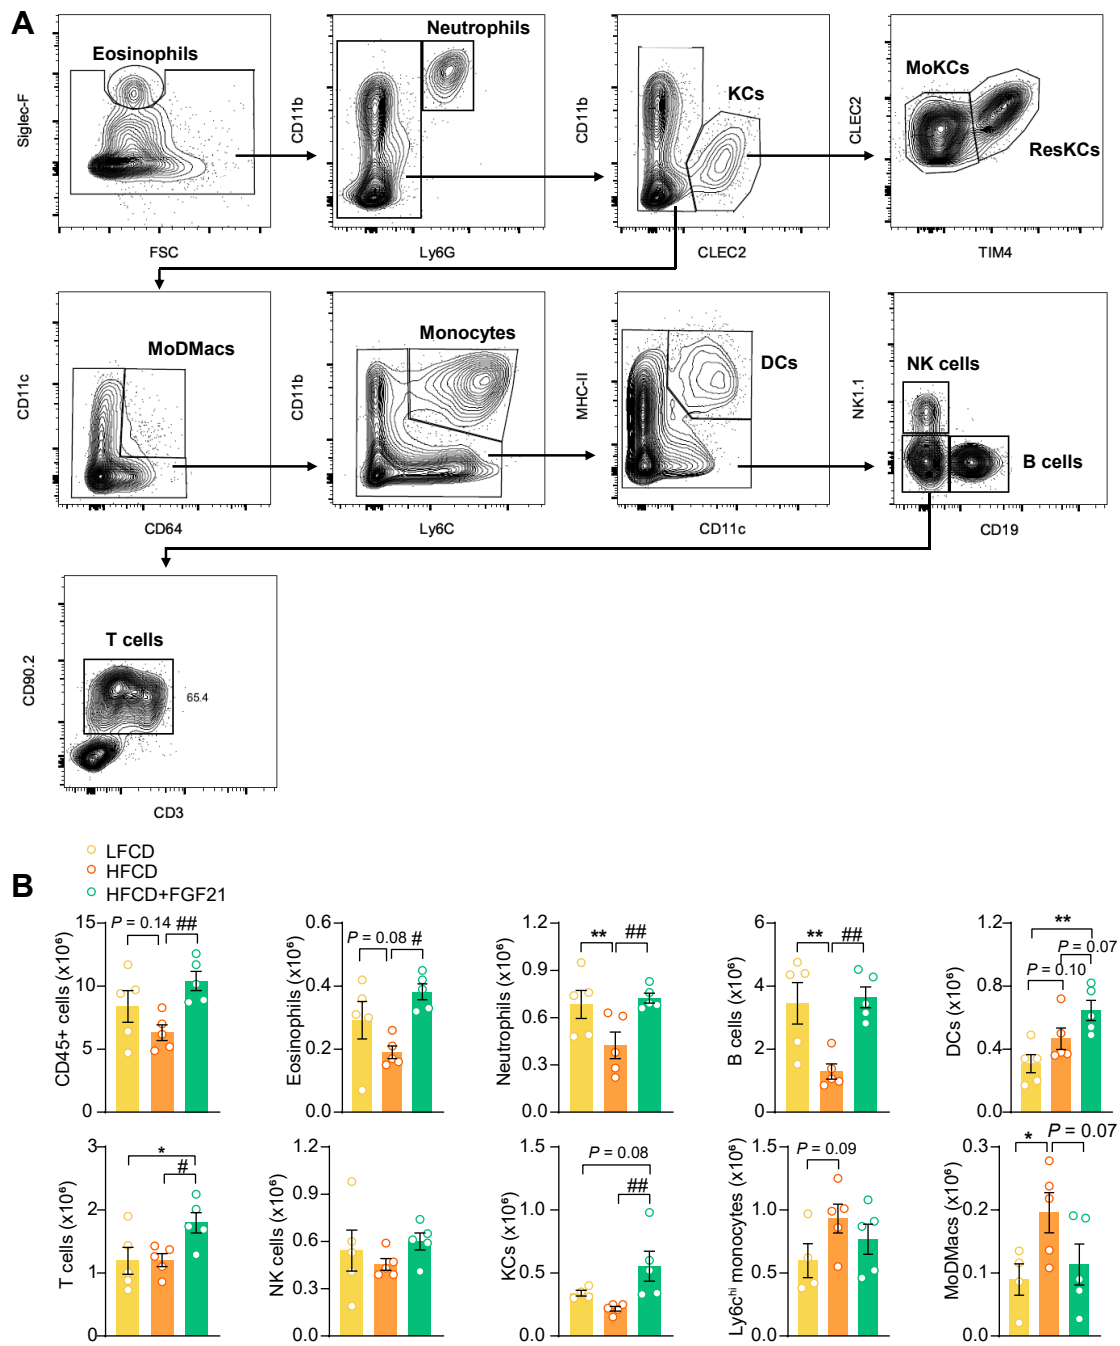

Supplement: supp [file elife-83075-supp-v1.zip]

Figure 3-figure supplement 1

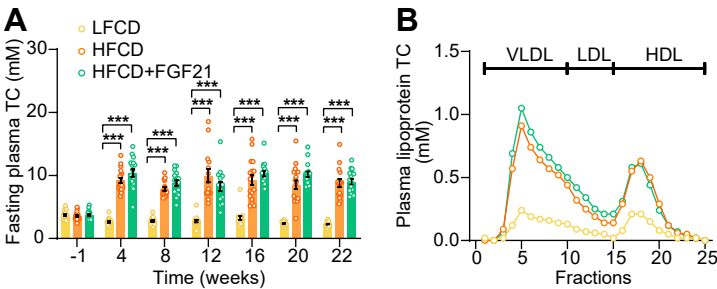

Supplement: supp [file elife-83075-supp-v1.zip]

Figure 2-figure supplement 1

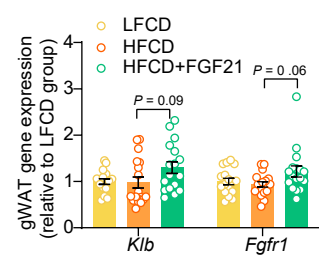

Supplement: supp [file elife-83075-supp-v1.zip]

Figure 5-figure supplement 2

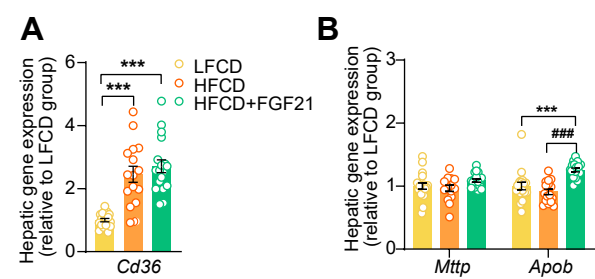

Supplement: supp [file elife-83075-supp-v1.zip]
